# Supplementary material
Source: PubMed Central journal article supplement (PMC9256856)
Supplement: NIHMS1758812-supplement-Tables.pdf [file NIHMS1758812-supplement-Tables.pdf]

*Table S1: Correlations Between Laboratory and MRI Versions of the EF Tasks in Individuals Who Completed Both Versions*

| <u>Measure</u>  | <u>N</u> | <u>r</u> | <u>p</u> |
|-----------------|----------|----------|----------|
| Antisaccade     | 161      | 0.67     | <.001    |
| Stroop          | 167      | 0.69     | <.001    |
| Number Letter   | 172      | 0.69     | <.001    |
| Category Switch | 164      | 0.76     | <.001    |
| Keep Track      | 166      | 0.52     | <.001    |
| Letter Memory   | 171      | 0.88     | <.001    |

*Note:* Total N=175.

*Table S2: Cross-Sibling Cross-Trait Correlations for Latent Variables*

| <u>Variable</u>                                         | <u>MZ</u> | <u>DZ</u> | <u>Bio Sibs</u> | <u>Adop Sibs</u> |
|---------------------------------------------------------|-----------|-----------|-----------------|------------------|
| <i>Cross-Sibling Within-Trait Correlations</i>          |           |           |                 |                  |
| Common EF                                               | 0.82      | 0.37      | 0.32            | 0.18             |
| Updating-Specific                                       | 1.00*     | 0.44      | 0.07            | 0.00             |
| Shifting-Specific                                       | 0.79      | 0.36      | 0.40            | 0.23             |
| WAIS                                                    | 0.85      | 0.53      | 0.43            | 0.11             |
| <i>Cross-Sibling Cross-Trait Correlations with WAIS</i> |           |           |                 |                  |
| Common EF                                               | 0.20      | 0.10      | 0.12            | 0.09             |
| Updating-Specific                                       | 0.74      | 0.37      | 0.49            | 0.12             |
| Shifting-Specific                                       | 0.20      | 0.10      | 0.14            | 0.10             |

*Note:* \* indicates that the correlation within MZ twins was constrained to be 1.0 because it was estimated slightly above 1.0. MZ = Monozygotic twins; DZ = Dizygotic twins; Bio Sibs = Biological siblings; Adop Sibs = Adoptive siblings (not genetically related); EF = Executive function, WAIS = Weschler Adult Intelligence Scale.

Table S3: Cross-Twin Cross-Trait Correlations for All Study Measures in the Longitudinal Twin Study (LTS) Subsample

| Measure                | N   | 1     | 2     | 3      | 4      | 5    | 6     | 7     | 8     | 9     | 10     | 11     | 12   | 13    | 14    |
|------------------------|-----|-------|-------|--------|--------|------|-------|-------|-------|-------|--------|--------|------|-------|-------|
| <i>MZ Twins</i>        |     |       |       |        |        |      |       |       |       |       |        |        |      |       |       |
| 1. S1 Antisaccade      | 179 | 12.69 |       |        |        |      |       |       |       |       |        |        |      |       |       |
| 2. S1 Stroop           | 181 | .21   | 78.46 |        |        |      |       |       |       |       |        |        |      |       |       |
| 3. S1 Number Letter    | 178 | .29   | .24   | 146.90 |        |      |       |       |       |       |        |        |      |       |       |
| 4. S1 Category Switch  | 178 | .38   | .39   | .58    | 159.47 |      |       |       |       |       |        |        |      |       |       |
| 5. S1 Keep Track       | 181 | .40   | .22   | .23    | .38    | 9.22 |       |       |       |       |        |        |      |       |       |
| 6. S1 Letter Memory    | 181 | .37   | .30   | .10    | .21    | .53  | 13.39 |       |       |       |        |        |      |       |       |
| 7. S1 WAIS             | 177 | .42   | .30   | .14    | .33    | .65  | .59   | 11.03 |       |       |        |        |      |       |       |
| 8. S2 Antisaccade      | 177 | .55   | .31   | .29    | .38    | .27  | .31   | .28   | 13.46 |       |        |        |      |       |       |
| 9. S2 Stroop           | 182 | .21   | .44   | .21    | .35    | .38  | .30   | .27   | .30   | 80.03 |        |        |      |       |       |
| 10. S2 Number Letter   | 175 | .22   | .05   | .54    | .39    | .22  | .09   | .14   | .22   | .25   | 140.63 |        |      |       |       |
| 11. S2 Category Switch | 181 | .29   | .24   | .40    | .59    | .33  | .23   | .30   | .36   | .30   | .54    | 151.13 |      |       |       |
| 12. S2 Keep Track      | 180 | .20   | .21   | .19    | .25    | .46  | .49   | .41   | .34   | .35   | .17    | .23    | 8.53 |       |       |
| 13. S2 Letter Memory   | 182 | .35   | .25   | .13    | .30    | .53  | .68   | .52   | .37   | .35   | .17    | .26    | .46  | 14.32 |       |
| 14. S2 WAIS            | 178 | .40   | .28   | .19    | .38    | .62  | .58   | .83   | .34   | .36   | .23    | .29    | .41  | .61   | 11.28 |
| <i>DZ Twins</i>        |     |       |       |        |        |      |       |       |       |       |        |        |      |       |       |
| 1. S1 Antisaccade      | 157 | 13.98 |       |        |        |      |       |       |       |       |        |        |      |       |       |
| 2. S1 Stroop           | 165 | .30   | 72.34 |        |        |      |       |       |       |       |        |        |      |       |       |
| 3. S1 Number Letter    | 161 | .33   | .20   | 152.89 |        |      |       |       |       |       |        |        |      |       |       |
| 4. S1 Category Switch  | 165 | .44   | .23   | .66    | 148.72 |      |       |       |       |       |        |        |      |       |       |
| 5. S1 Keep Track       | 166 | .44   | .08   | .12    | .24    | 8.16 |       |       |       |       |        |        |      |       |       |
| 6. S1 Letter Memory    | 165 | .50   | .29   | .14    | .25    | .44  | 14.57 |       |       |       |        |        |      |       |       |
| 7. S1 WAIS             | 161 | .29   | .21   | .00    | .18    | .49  | .42   | 11.11 |       |       |        |        |      |       |       |
| 8. S2 Antisaccade      | 163 | .19   | .12   | .07    | .07    | .13  | .20   | .02   | 13.22 |       |        |        |      |       |       |
| 9. S2 Stroop           | 168 | .07   | .23   | .01    | .14    | .04  | .12   | .10   | .27   | 80.68 |        |        |      |       |       |
| 10. S2 Number Letter   | 168 | .10   | .21   | .28    | .32    | .03  | .18   | .00   | .38   | .33   | 164.16 |        |      |       |       |
| 11. S2 Category Switch | 168 | .13   | .20   | .07    | .13    | .07  | .10   | .05   | .35   | .30   | .44    | 143.23 |      |       |       |
| 12. S2 Keep Track      | 169 | .09   | .04   | -.04   | -.08   | .16  | .11   | .23   | .31   | .21   | .04    | .06    | 8.30 |       |       |
| 13. S2 Letter Memory   | 169 | .22   | .13   | .02    | .07    | .30  | .29   | .27   | .45   | .29   | .09    | .16    | .56  | 13.99 |       |
| 14. S2 WAIS            | 168 | .12   | .08   | -.06   | -.02   | .25  | .15   | .49   | .23   | .18   | -.06   | .08    | .58  | .54   | 11.38 |

Note: Measures based on reaction times (Stroop, Number Letter, and Category Switch) were reverse scored so that higher numbers indicate better performance on all measures. Standard deviations of each measure are provided on the diagonal. S1 = Sibling #1; S2 = Sibling #2; MZ = Monozygotic (i.e., identical) twin pairs; DZ = Dizygotic twin (i.e., fraternal) pairs; WAIS= Weschler Adult Intelligence Scale.

Table S4: Cross-Sibling Cross-Trait Correlations for All Study Measures in the Colorado Adoption Project (CAP) Subsample

| Measure                    | <i>N</i> | 1     | 2     | 3      | 4      | 5     | 6     | 7     | 8     | 9     | 10     | 11     | 12    | 13    | 14    |
|----------------------------|----------|-------|-------|--------|--------|-------|-------|-------|-------|-------|--------|--------|-------|-------|-------|
| <i>Biological Siblings</i> |          |       |       |        |        |       |       |       |       |       |        |        |       |       |       |
| 1. S1 Antisaccade          | 161      | 16.90 |       |        |        |       |       |       |       |       |        |        |       |       |       |
| 2. S1 Stroop               | 161      | .36   | 86.06 |        |        |       |       |       |       |       |        |        |       |       |       |
| 3. S1 Number Letter        | 161      | .25   | .26   | 188.22 |        |       |       |       |       |       |        |        |       |       |       |
| 4. S1 Category Switch      | 161      | .30   | .35   | .52    | 185.69 |       |       |       |       |       |        |        |       |       |       |
| 5. S1 Keep Track           | 159      | .40   | .30   | .20    | .14    | 13.13 |       |       |       |       |        |        |       |       |       |
| 6. S1 Letter Memory        | 157      | .51   | .35   | .12    | .05    | .44   | 14.32 |       |       |       |        |        |       |       |       |
| 7. S1 WAIS                 | 159      | .36   | .38   | .15    | .23    | .60   | .46   | 10.65 |       |       |        |        |       |       |       |
| 8. S2 Antisaccade          | 121      | .27   | .28   | -.13   | -.06   | .20   | .07   | .16   | 16.06 |       |        |        |       |       |       |
| 9. S2 Stroop               | 122      | .20   | .13   | .01    | .10    | .16   | .16   | .09   | .39   | 80.00 |        |        |       |       |       |
| 10. S2 Number Letter       | 121      | .11   | .29   | .03    | .14    | .22   | .00   | .27   | .39   | .36   | 200.62 |        |       |       |       |
| 11. S2 Category Switch     | 122      | .00   | .10   | .12    | .22    | -.01  | -.15  | .12   | .45   | .34   | .40    | 184.33 |       |       |       |
| 12. S2 Keep Track          | 122      | .28   | .24   | -.06   | .01    | .21   | .01   | .29   | .30   | .31   | .11    | .24    | 14.14 |       |       |
| 13. S2 Letter Memory       | 122      | .26   | .30   | -.05   | .04    | .22   | .23   | .16   | .40   | .57   | .08    | .10    | .52   | 15.20 |       |
| 14. S2 WAIS                | 121      | .07   | .17   | .02    | .01    | .41   | .11   | .41   | .31   | .42   | .10    | .26    | .63   | .53   | 12.04 |
| <i>Adopted Siblings</i>    |          |       |       |        |        |       |       |       |       |       |        |        |       |       |       |
| 1. S1 Antisaccade          | 138      | 17.48 |       |        |        |       |       |       |       |       |        |        |       |       |       |
| 2. S1 Stroop               | 140      | .29   | 82.14 |        |        |       |       |       |       |       |        |        |       |       |       |
| 3. S1 Number Letter        | 140      | .12   | .19   | 173.78 |        |       |       |       |       |       |        |        |       |       |       |
| 4. S1 Category Switch      | 140      | .31   | .26   | .34    | 187.12 |       |       |       |       |       |        |        |       |       |       |
| 5. S1 Keep Track           | 139      | .29   | .22   | .12    | .23    | 13.01 |       |       |       |       |        |        |       |       |       |
| 6. S1 Letter Memory        | 139      | .35   | .20   | .07    | .21    | .55   | 15.17 |       |       |       |        |        |       |       |       |
| 7. S1 WAIS                 | 141      | .35   | .13   | .01    | .21    | .61   | .45   | 12.09 |       |       |        |        |       |       |       |
| 8. S2 Antisaccade          | 103      | .02   | .08   | .05    | -.08   | -.01  | .22   | -.06  | 15.73 |       |        |        |       |       |       |
| 9. S2 Stroop               | 104      | -.05  | .06   | .15    | .20    | .14   | .01   | .14   | .28   | 79.85 |        |        |       |       |       |
| 10. S2 Number Letter       | 102      | .17   | .28   | .15    | .05    | -.04  | -.04  | .19   | .21   | .14   | 211.63 |        |       |       |       |
| 11. S2 Category Switch     | 104      | .05   | .00   | .03    | .05    | .03   | -.10  | .15   | .29   | .28   | .45    | 199.05 |       |       |       |
| 12. S2 Keep Track          | 104      | .11   | .00   | .17    | .20    | .09   | .16   | .11   | .32   | .19   | .06    | .18    | 14.83 |       |       |
| 13. S2 Letter Memory       | 99       | .16   | .24   | .16    | -.05   | .00   | .07   | -.01  | .25   | .08   | .23    | .22    | .53   | 15.10 |       |
| 14. S2 WAIS                | 103      | .05   | .06   | .02    | -.04   | .13   | .22   | .10   | .38   | .35   | .05    | .18    | .64   | .43   | 13.36 |

Note: Switch cost reaction times (RTs) were reverse scored prior to analyses so that higher numbers relate to better performance on all measures. Standard deviations of each measure are provided on the diagonal. S1 = Sibling #1; S2 = Sibling #2; WAIS= Weschler Adult Intelligence Scale.

Table S5: Estimates and 95% Confidence Intervals (95% CIs) from the Final Genetic Model (Figure 2)

| Path or Variance Component               | 95% CI   |       |       | Path or Variance Component                   | 95% CI   |       |       |
|------------------------------------------|----------|-------|-------|----------------------------------------------|----------|-------|-------|
|                                          | Estimate | Lower | Upper |                                              | Estimate | Lower | Upper |
| <i>Factor Loadings - LTS</i>             |          |       |       | <i>Correlations with WAIS</i>                |          |       |       |
| Antisaccade (Common EF)                  | 0.73     | 0.67  | 0.78  | A - Common EF                                | 0.29     | -0.75 | 0.81  |
| Stroop (Common EF)                       | 0.52     | 0.46  | 0.58  | A - Updating-Specific                        | 0.95     | 0.56  | 1.00  |
| Keep Track (Common EF)                   | 0.53     | 0.47  | 0.60  | A - Shifting-Specific                        | -0.13    | -0.76 | 0.67  |
| Letter Memory (Common EF)                | 0.56     | 0.50  | 0.62  | D - Common EF                                | 0.98     | -1.00 | 1.00  |
| Category Switch (Common EF)              | 0.54     | 0.47  | 0.60  | D - Updating-Specific                        | 0.17     | -1.00 | 1.00  |
| Number Letter (Common EF)                | 0.41     | 0.33  | 0.48  | D - Shifting-Specific                        | -0.13    | -1.00 | 1.00  |
| Keep Track (Updating-Specific)           | 0.55     | 0.48  | 0.61  | H - Common EF                                | 0.44     | 0.28  | 0.59  |
| Letter Memory (Updating-Specific)        | 0.46     | 0.40  | 0.51  | H - Updating-Specific                        | 0.69     | 0.59  | 0.80  |
| Category Switch (Shifting-Specific)      | 0.58     | 0.52  | 0.63  | H - Shifting-Specific                        | -0.11    | -0.33 | 0.12  |
| Number Letter (Shifting-Specific)        | 0.59     | 0.53  | 0.64  | C - Common EF                                | 0.73     | -1.00 | 1.00  |
| <i>Factor Loadings - CAP</i>             |          |       |       | C - Shifting-Specific                        | 0.68     | -0.78 | 1.00  |
| Antisaccade (Common EF)                  | 0.63     | 0.57  | 0.69  | E - Common EF                                | 0.60     | 0.33  | 0.94  |
| Stroop (Common EF)                       | 0.51     | 0.45  | 0.58  | E - Shifting-Specific                        | -0.47    | -0.19 | 0.05  |
| Keep Track (Common EF)                   | 0.40     | 0.35  | 0.46  | <i>Residual Variances (% variance) - LTS</i> |          |       |       |
| Letter Memory (Common EF)                | 0.53     | 0.47  | 0.59  | A - Antisaccade                              | 0.12     | 0.02  | 0.21  |
| Category Switch (Common EF)              | 0.45     | 0.39  | 0.51  | A - Stroop                                   | 0.19     | 0.09  | 0.29  |
| Number Letter (Common EF)                | 0.33     | 0.27  | 0.40  | A - Keep Track                               | 0.00     | 0.00  | 0.04  |
| Keep Track (Updating-Specific)           | 0.42     | 0.36  | 0.47  | A - Letter Memory                            | 0.19     | 0.12  | 0.26  |
| Letter Memory (Updating-Specific)        | 0.43     | 0.38  | 0.49  | A - Category Switch                          | 0.07     | 0.00  | 0.16  |
| Category Switch (Shifting-Specific)      | 0.49     | 0.44  | 0.54  | A - Number Letter                            | 0.18     | 0.09  | 0.27  |
| Number Letter (Shifting-Specific)        | 0.48     | 0.43  | 0.53  | E - Antisaccade                              | 0.35     | 0.28  | 0.44  |
| <i>Latent Variable ADCE (% variance)</i> |          |       |       | E - Stroop                                   | 0.54     | 0.45  | 0.64  |
| A - Common EF                            | 0.07     | 0.00  | 0.92  | E - Keep Track                               | 0.41     | 0.36  | 0.46  |
| A - Updating-Specific                    | 0.55     | 0.08  | 1.00  | E - Letter Memory                            | 0.28     | 0.22  | 0.35  |
| A - Shifting-Specific                    | 0.17     | 0.00  | 0.81  | E - Category Switch                          | 0.30     | 0.23  | 0.39  |
| A - WAIS                                 | 0.64     | 0.35  | 0.84  | E - Number Letter                            | 0.31     | 0.23  | 0.40  |

|                       |      |      |      |                                               |      |      |      |
|-----------------------|------|------|------|-----------------------------------------------|------|------|------|
| D - Common EF         | 0.65 | 0.00 | 0.90 | <i>Residual Variances (% variance) - CAP</i>  |      |      |      |
| D - Updating-Specific | 0.45 | 0.00 | 0.92 | A - Antisaccade                               | 0.09 | 0.02 | 0.17 |
| D - Shifting-Specific | 0.43 | 0.00 | 0.83 | A - Stroop                                    | 0.18 | 0.08 | 0.28 |
| D - WAIS              | 0.11 | 0.00 | 0.36 | A - Keep Track                                | 0.00 | 0.00 | 0.02 |
| H - Common EF         | 0.72 | 0.51 | 0.94 | A - Letter Memory                             | 0.17 | 0.10 | 0.25 |
| H - Updating-Specific | 1.00 | 0.83 | 1.00 | A - Category Switch                           | 0.05 | 0.00 | 0.12 |
| H - Shifting-Specific | 0.60 | 0.23 | 0.85 | A - Number Letter                             | 0.12 | 0.06 | 0.19 |
| H - WAIS              | 0.74 | 0.62 | 0.85 | E - Antisaccade                               | 0.51 | 0.42 | 0.60 |
| C - Common EF         | 0.18 | 0.00 | 0.36 | E - Stroop                                    | 0.56 | 0.45 | 0.66 |
| C - Updating-Specific | 0.00 | 0.00 | 0.13 | E - Keep Track                                | 0.66 | 0.61 | 0.72 |
| C - Shifting-Specific | 0.10 | 0.00 | 0.38 | E - Letter Memory                             | 0.36 | 0.27 | 0.45 |
| C - WAIS              | 0.10 | 0.00 | 0.21 | E - Category Switch                           | 0.50 | 0.41 | 0.59 |
| E - Common EF         | 0.11 | 0.04 | 0.19 | E - Number Letter                             | 0.54 | 0.45 | 0.62 |
| E - Updating-Specific | 0.00 | 0.00 | 0.15 | <i>Residual Variances (% variance) - WAIS</i> |      |      |      |
| E - Shifting-Specific | 0.31 | 0.13 | 0.52 | A - WAIS                                      | 0.00 | 0.00 | 0.30 |
| E - WAIS              | 0.16 | 0.13 | 0.20 | D - WAIS                                      | 0.00 | 0.00 | 0.16 |
|                       |      |      |      | C - WAIS                                      | 0.00 | 0.00 | 0.12 |
|                       |      |      |      | E - WAIS                                      | 0.10 | 0.01 | 0.15 |

*Note:* Results correspond to the model depicted in Figure 2 in the main text, though squared path coefficients are presented here (for latent ADCE and residual ACEs). Factor loadings and residual additive genetic influences were equated across LTS and CAP subsamples, but standardized estimates differ because residual nonshared environmental influences were allowed to differ across subsample. A = Additive genetic; D = Dominance genetic; H = Broad-sense genetic (i.e., additive + dominance); C = Shared environment; E = Nonshared environment; LTS = Longitudinal Twin Sample; CAP = Colorado Adoption Project; WAIS = Weschler Adult Intelligence Scale.

*Table S6: Descriptive Statistics for All Study Measures Including Harmonized and Raw MRI Tasks*

| Measure                                         | N   | M      | SD     | Range           | Skewness | Kurtosis | Reliability       |
|-------------------------------------------------|-----|--------|--------|-----------------|----------|----------|-------------------|
| <i>Longitudinal Twin Study</i>                  |     |        |        |                 |          |          |                   |
| Antisaccade (% correct) - All                   | 676 | 73.05  | 13.57  | 16.67, 99.75    | -0.53    | 0.25     | -                 |
| Antisaccade (% correct) - Laboratory            | 228 | 72.68  | 17.38  | 16.67, 98.61    | -0.62    | -0.25    | 0.91 <sup>a</sup> |
| Antisaccade (% correct) - MRI raw               | 448 | -0.02  | 0.99   | -2.36, 2.33     | -0.17    | -0.73    | 0.94 <sup>a</sup> |
| Antisaccade (% correct) - MRI harmonized        | 448 | 73.24  | 11.16  | 46.78, 99.75    | -0.17    | -0.73    | 0.94 <sup>a</sup> |
| Stroop (RT Interference)                        | 696 | 151.35 | 78.66  | -90.29, 426.38  | 0.82     | 1.12     | 0.96 <sup>a</sup> |
| Number Letter (RT Switch Cost) - All            | 682 | 245.60 | 151.42 | -81.90, 928.69  | 1.27     | 2.68     | -                 |
| Number Letter (RT Switch Cost) - Laboratory     | 231 | 260.21 | 193.19 | -81.90, 928.69  | 1.21     | 1.66     | 0.91 <sup>a</sup> |
| Number Letter (RT Switch Cost) - MRI raw        | 451 | 180.00 | 117.94 | -29.58, 565.54  | 0.86     | 0.85     | 0.93 <sup>a</sup> |
| Number Letter (RT Switch Cost) - MRI harmonized | 451 | 238.13 | 124.31 | 17.23, 644.49   | 0.86     | 0.85     | 0.93 <sup>a</sup> |
| Category Switch (RT Switch Cost)                | 692 | 184.03 | 151.63 | -103.05, 800.11 | 1.14     | 1.46     | 0.91 <sup>a</sup> |
| Keep Track (% correct) - All                    | 696 | 70.71  | 8.66   | 26.63, 97.22    | -0.89    | 2.48     | -                 |
| Keep Track (% correct) - Laboratory             | 234 | 70.19  | 11.93  | 26.63, 97.22    | -0.71    | 0.88     | 0.64 <sup>b</sup> |
| Keep Track (% correct) - MRI raw                | 462 | 76.50  | 14.01  | 34.96, 100.00   | -0.68    | 0.13     | 0.75 <sup>b</sup> |
| Keep Track (% correct) - MRI harmonized         | 462 | 70.97  | 6.39   | 52.01, 81.70    | -0.68    | 0.13     | 0.75 <sup>b</sup> |
| Letter Memory (% correct)                       | 697 | 72.77  | 14.18  | 25.73, 100.00   | -0.09    | -0.73    | 0.93 <sup>b</sup> |
| WAIS Full Scale IQ                              | 684 | 108.87 | 11.31  | 74, 143         | -0.14    | -0.01    | 0.97 <sup>c</sup> |
| <i>Colorado Adoption Project</i>                |     |        |        |                 |          |          |                   |
| Antisaccade (% correct)                         | 533 | 66.12  | 17.43  | 15.28, 98.61    | -0.37    | -0.55    | 0.90 <sup>a</sup> |
| Stroop (RT Interference)                        | 537 | 176.20 | 82.12  | 1.93, 426.38    | 0.70     | 0.61     | 0.96 <sup>a</sup> |
| Number Letter (RT Switch Cost)                  | 534 | 294.83 | 194.20 | -157.13, 928.69 | 0.98     | 1.39     | 0.91 <sup>a</sup> |
| Category Switch (RT Switch Cost)                | 537 | 252.20 | 188.32 | -163.94, 808.37 | 0.94     | 0.66     | 0.93 <sup>a</sup> |
| Keep Track (% correct)                          | 534 | 65.75  | 13.61  | 26.63, 94.44    | -0.48    | 0.01     | 0.60 <sup>b</sup> |
| Letter Memory (% correct)                       | 527 | 69.88  | 15.06  | 25.73, 100.00   | -0.14    | -0.38    | 0.93 <sup>b</sup> |
| WAIS Full Scale IQ                              | 534 | 112.42 | 12.17  | 69, 148         | -0.07    | 0.18     | 0.97 <sup>c</sup> |

*Note:* Reliability was computed using the split-half Spearman-Brown coefficient (<sup>a</sup>), Cronbach's alpha (<sup>b</sup>), or based on internal reliability from Wechsler (1997) (<sup>c</sup>). Reliability for MRI subjects was based on all subjects who completed that version, including the  $n=153$  individuals whose primary data was analyzed based on their CATSLife assessment. RT = Reaction time; WAIS = Weschler Adult Intelligence Scale; IQ = Intelligence quotient.

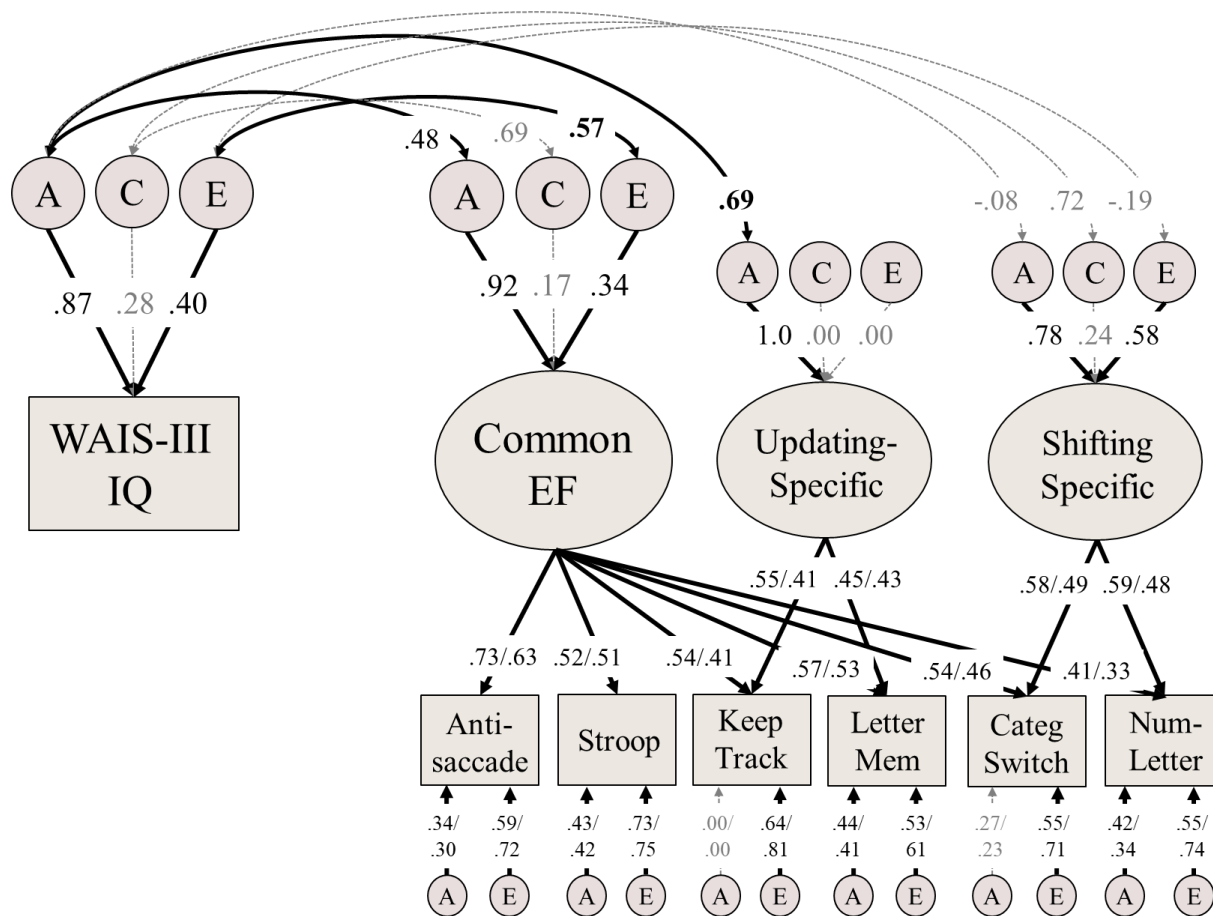

*Figure S1:* This figure displays a similar model as Figure 2 in the main text except all dominance genetic influences are not estimated, for comparison with prior studies. Results of this ACE model are similar, and this model did not fit significantly worse than the ADCE model,  $\chi^2(7)=5.78$ ,  $p=.567$ . However, shared environmental estimates (C) are smaller in this model given that they can be cancelled out by the presence of (nonsignificant) dominance genetic influences (D). Therefore, we present the full ADCE model in the main text. Most paths were equated across subsample, but because residual nonshared environmental influences were allowed to differ, standardized estimates of factor loadings and residual A influences also differ across Longitudinal Twin Study subsample (LTS; left) and the Colorado Adoption Project subsample (CAP; right). Significant paths are displayed in black text, with solid black arrows ( $p<.05$ ). Model Fit:  $\chi^2(420)=644.78$ ,  $p<.001$ , RMSEA=.028, CFI=.907. A = Additive genetic influences; E = Nonshared environmental influences; WAIS-III IQ = Weschler Adult Intelligence Scale full-scale intelligence quotient.

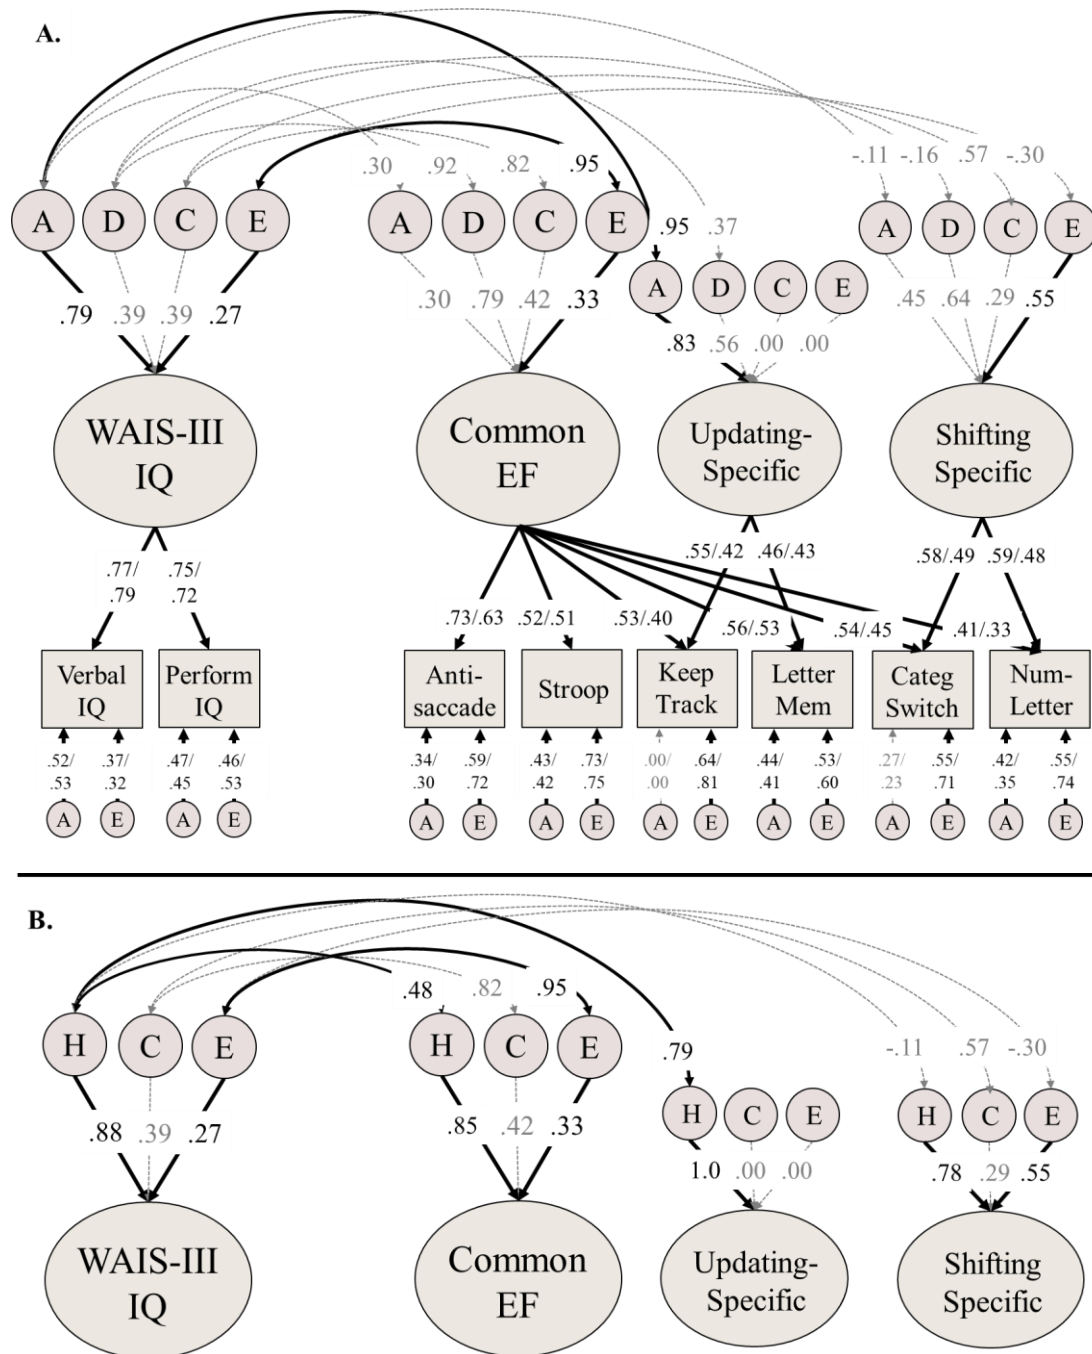

*Figure S2:* This figure displays a similar model to Figure 2 in the main text except full-scale IQ has been replaced with a latent variable based on verbal IQ and performance IQ subtests. Most paths were equated across subsample, but because residual nonshared environmental influences were allowed to differ, standardized estimates of factor loadings and residual A influences also differ across Longitudinal Twin Study subsample (LTS; left) and the Colorado Adoption Project subsample (CAP; right). Significant paths are displayed in bold, with solid black arrows ( $p < .05$ ). Model Fit:  $\chi^2(537) = 865.86$ ,  $p < .001$ , RMSEA = .029, CFI = .900. A = Additive genetic influences; C = Shared/common environmental influences; E = Nonshared environmental influences; WAIS-III IQ = Weschler Adult Intelligence Scale full-scale intelligence quotient.



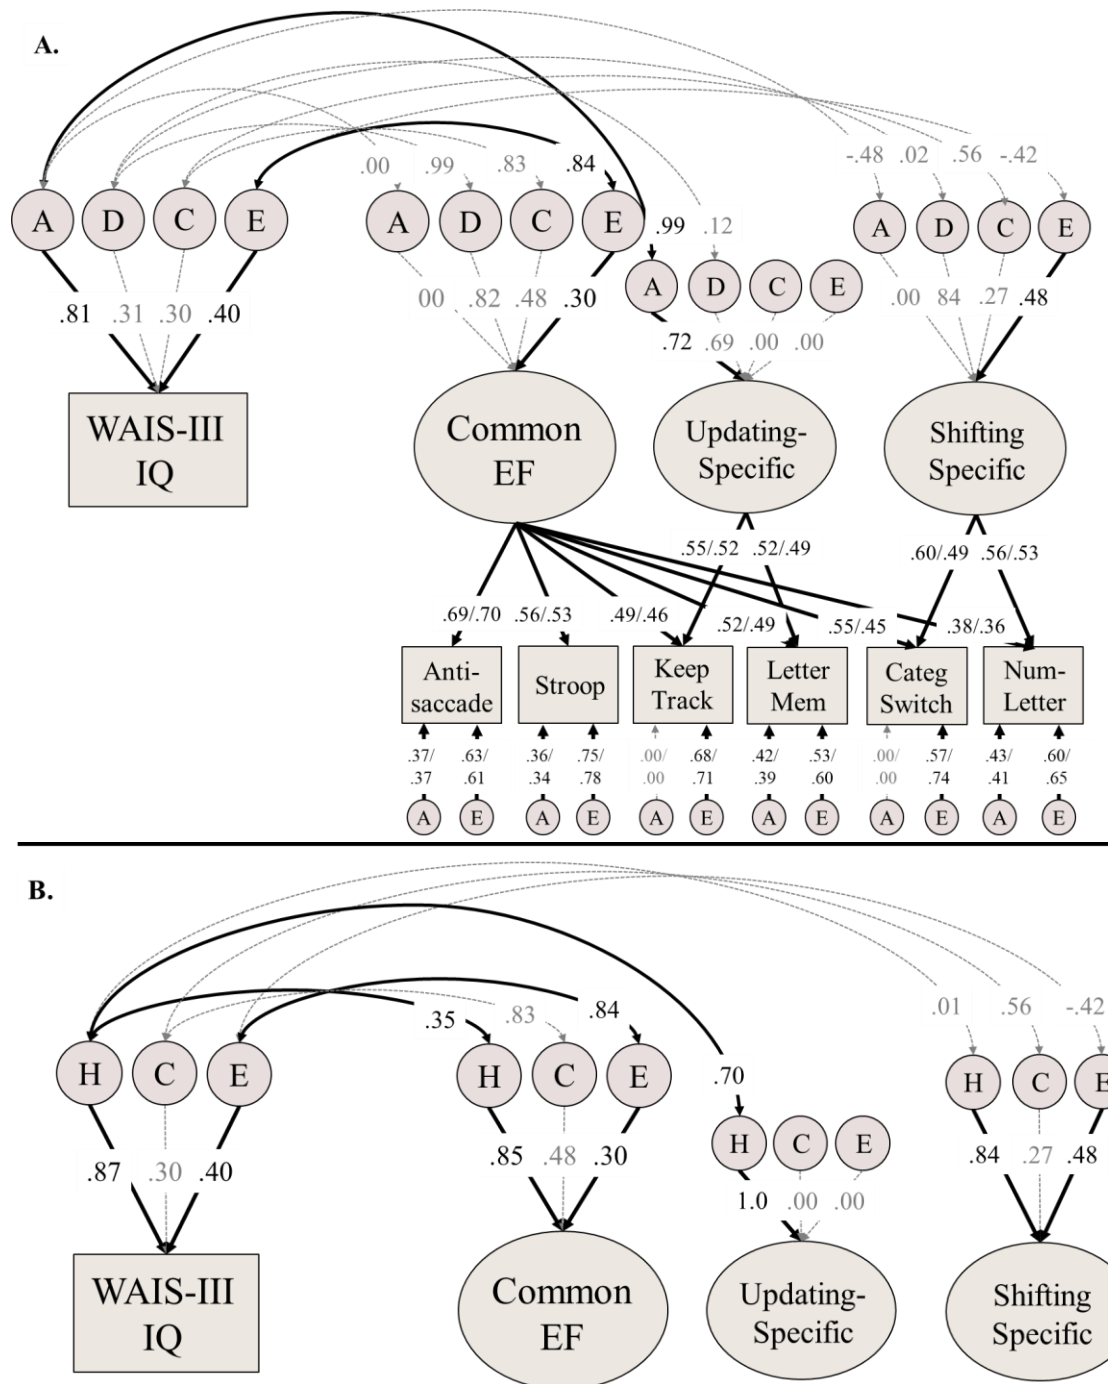

*Figure S3:* This figure displays a similar model to Figure 3 in the main text except all data from MRI tasks has been excluded (i.e., 3 of 6 EF tasks for  $n=485$  subjects). Most paths were equated across subsample, but because residual nonshared environmental influences were allowed to differ, standardized estimates of factor loadings and residual A influences also differ across Longitudinal Twin Study subsample (LTS; left) and the Colorado Adoption Project subsample (CAP; right). Significant paths are displayed in black text, with solid black arrows ( $p < .05$ ). Model Fit:  $\chi^2(413)=579.38$ ,  $p < .001$ , RMSEA=.024, CFI=.919. A = Additive genetic influences; C = Shared/common environmental influences; E = Nonshared environmental influences; WAIS-III IQ = Weschler Adult Intelligence Scale full-scale intelligence quotient.
